# Supplementary material for: Functional Block of Interleukin-6 Reduces a Bone Pain Marker But Not Bone Loss in Hindlimb-Unloaded Mice
Source: MDPI journal article supplement (doi:10.3390/ijms21103521), 2020-05-15
Supplement: s1 [file s1]

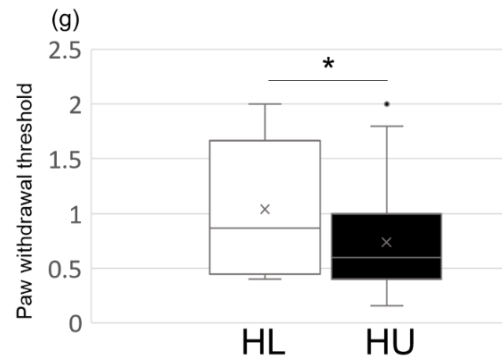

**Figure S1.** Paw withdrawal threshold after a 2-week tail suspension.

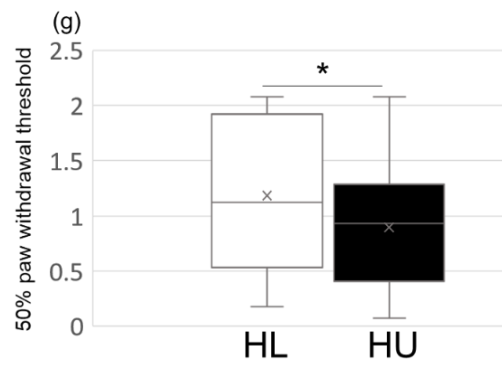

**Figure S2.** 50% paw withdrawal threshold after a 2-week tail suspension.

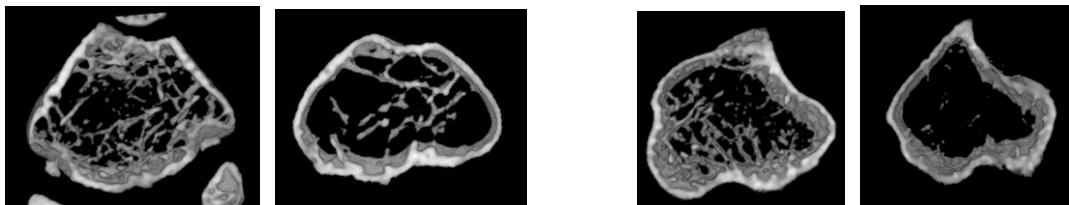

**Figure S3.** Three-dimensional images of distal femoral and proximal tibial metaphysis after a 2-week tail suspension.

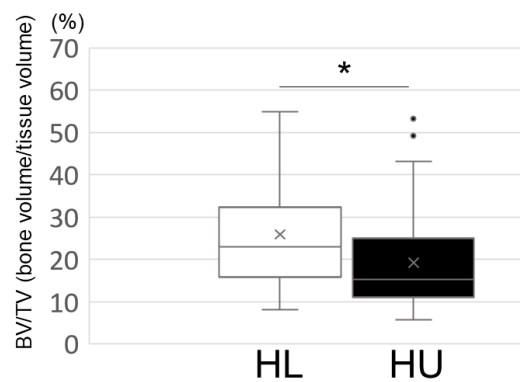

**Figure S4.** BV/TV of distal femoral metaphysis after a 2-week tail suspension.

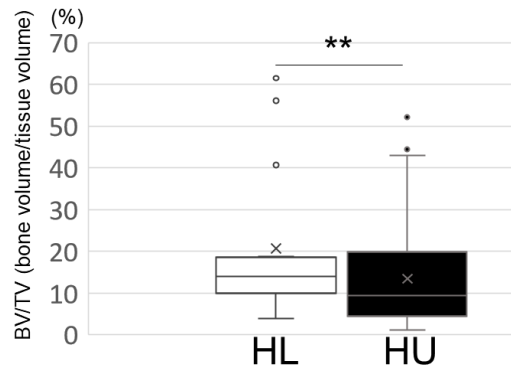

**Figure S5.** BV/TV of proximal tibial metaphysis after a 2-week tail suspension.
